# Supplementary material for: Modified Clerodanes from the Essential Oil of Dodonea viscosa Leaves
Source: PubMed Central journal article supplement (PMC7070720; doi:10.3390/molecules25040850), 2020-02-14
Supplement: molecules-25-00850-s001.pdf [file molecules-25-00850-s001.pdf]

1 Article

2 **Modified clerodanes from the essential oil of**  
3 ***Dodonea viscosa* leaves**

4 **Arnaud Marvilliers**<sup>1</sup>, **Bertrand Illien**<sup>1</sup>, **Emmanuelle Gros**<sup>1</sup>, **Jonathan Sorres**<sup>2</sup>, **Yoel**  
5 **Kashmann**<sup>3</sup>, **Hermann Thomas**<sup>4</sup>, **Jacqueline Smadja**<sup>1</sup> and **Anne Gauvin-Bialecki**<sup>1,\*</sup>

6 <sup>1</sup> Laboratoire de Chimie des Substances Naturelles et des Sciences des Aliments, Faculté des Sciences  
7 et Technologies, Université de la Réunion, 15 Avenue René Cassin, CS 92 003, 97 744 St Denis,  
8 Messag Cedex 9, La Réunion, France

9 <sup>2</sup> Service RMN, Institut de Chimie des Substances Naturelles, CNRS, 91 110 Gif-sur-Yvette, France

10 <sup>3</sup> School of Chemistry, Tel Aviv University, 69978 Tel Aviv, Israël

11 <sup>4</sup> Parc national de La Réunion, Secteur Nord, 165 allée des spinelles Bellepierre, 97400 St-Denis,  
12 France

13

14 \* Correspondence: e-mail: anne.bialecki@univ-reunion.fr; Tel.: +262-262-93 81 97

15 Received: date; Accepted: date; Published: date

16

17

18 P2 **Figure S1.** <sup>1</sup>H NMR spectrum of **1** at 600 MHz in CDCl<sub>3</sub>.

19 P2 **Figure S2.** <sup>1</sup>H NMR spectrum of **1** at 600 MHz in CDCl<sub>3</sub>.

20 P3 **Figure S3.** <sup>13</sup>C NMR (APT) spectrum of **1** at 150 MHz in CDCl<sub>3</sub>.

21 P3 **Figure S4.** <sup>13</sup>C NMR (APT) spectrum of **1** at 150 MHz in CDCl<sub>3</sub>.

22 P4 **Figure S5.** HSQC NMR spectrum of **1** at 600 MHz in CDCl<sub>3</sub>.

23 P4 **Figure S6.** HSQC NMR spectrum of **1** at 600 MHz in CDCl<sub>3</sub>.

24 P5 **Figure S7.** HMBC NMR spectrum of **1** at 600 MHz in CDCl<sub>3</sub>.

25 P5 **Figure S8.** HMBC NMR spectrum of **1** at 600 MHz in CDCl<sub>3</sub>.

26 P6 **Figure S9.** HMBC NMR spectrum of **1** at 600 MHz in CDCl<sub>3</sub>.

27 P7 **Figure S10.** NOESY NMR spectrum of **1** at 600 MHz in C<sub>6</sub>D<sub>6</sub>.

28 P7 **Figure S11.** NOESY NMR spectrum of **1** at 600 MHz in C<sub>6</sub>D<sub>6</sub>.

29 P8 **Figure S12.** (+)HRESIMS spectrum of **1**

30 P8 **Figure S13.** EI-MS spectrum of **1**.

31

32 P9 **Figure S14.** <sup>1</sup>H NMR spectrum of **3** at 600 MHz in CDCl<sub>3</sub>.

33 P9 **Figure S15.** (+)HRESIMS spectrum of **3**

34 P10 **Figure S16.** EI-MS spectrum of **3**.

35

36

37  
38  
39  
40  
41  
42  
43  
44  
45  
46  
47  
48  
49  
50  
51  
52  
53  
54  
55  
56  
57  
58  
59  
60  
61  
62  
63  
64  
65  
66  
67  
68  
69  
70  
71  
72  
73  
74  
75  
76  
77

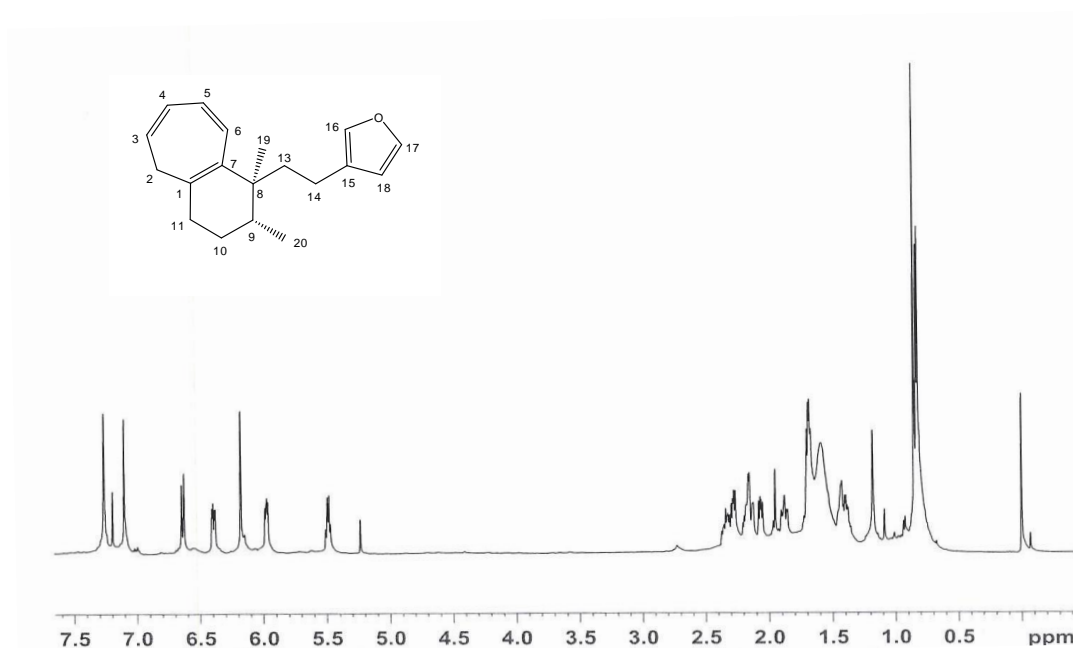

Figure S1.  $^1\text{H}$  NMR spectrum of **1** at 600 MHz in  $\text{CDCl}_3$ .

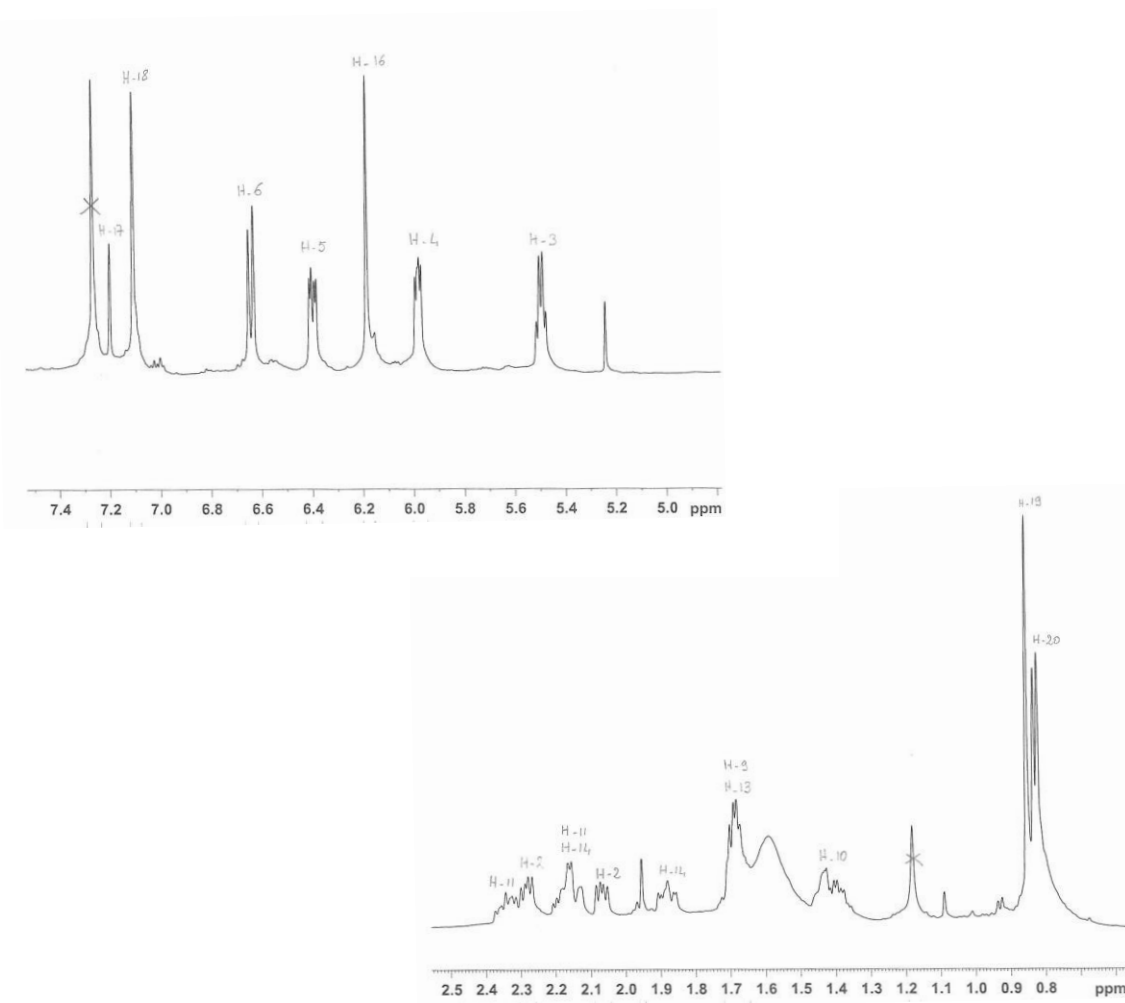

Figure S2.  $^1\text{H}$  NMR spectrum of **1** at 600 MHz in  $\text{CDCl}_3$ .



118  
119  
120  
121  
122  
123  
124  
125  
126  
127  
128  
129  
130  
131  
132

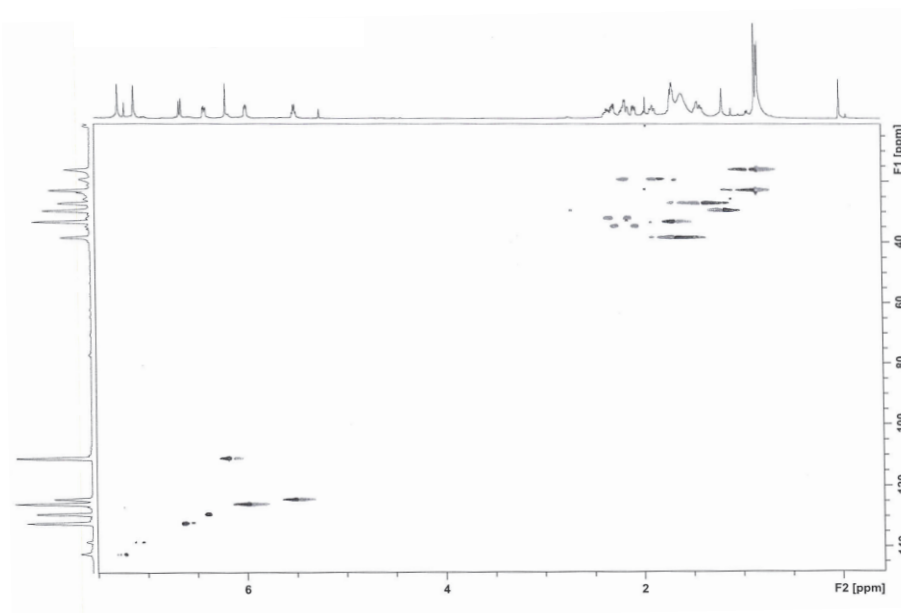

Figure S5. HSQC NMR spectrum of 1 at 600 MHz in CDCl<sub>3</sub>.

13  
13  
13  
13  
13  
13  
13  
13  
14  
14  
14  
14  
14

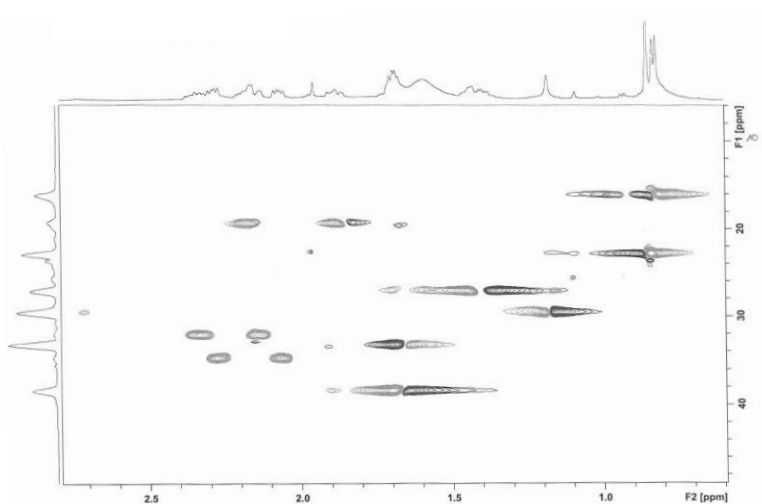

145  
146  
147  
148  
149  
150  
151  
152  
153  
154  
155  
156  
157  
158  
159

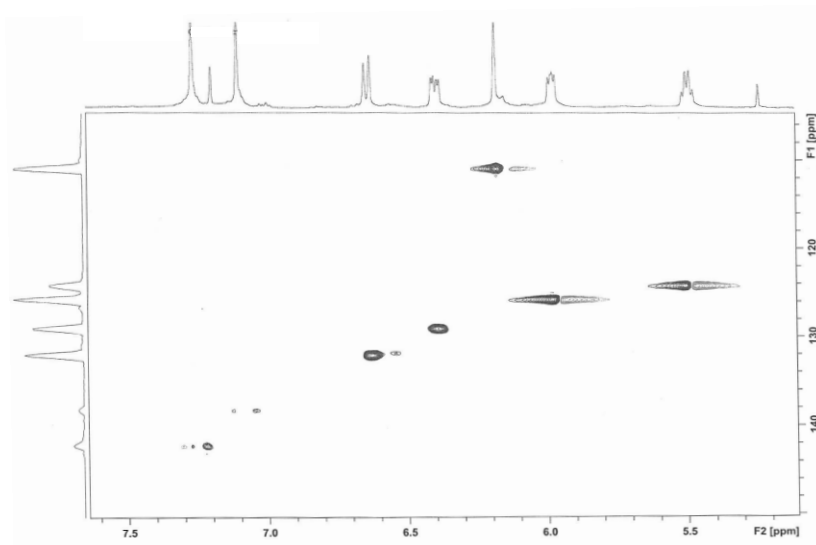

Figure S6. HSQC NMR spectrum of 1 at 600 MHz in CDCl<sub>3</sub>.

160  
161  
162  
163  
164  
165  
166  
167  
168  
169  
170  
171  
172  
173  
174  
175  
176  
177  
178  
179  
180  
181  
182  
183  
184  
185  
186  
187  
188  
189  
190  
191  
192  
193  
194  
195  
196  
197  
198  
199  
200

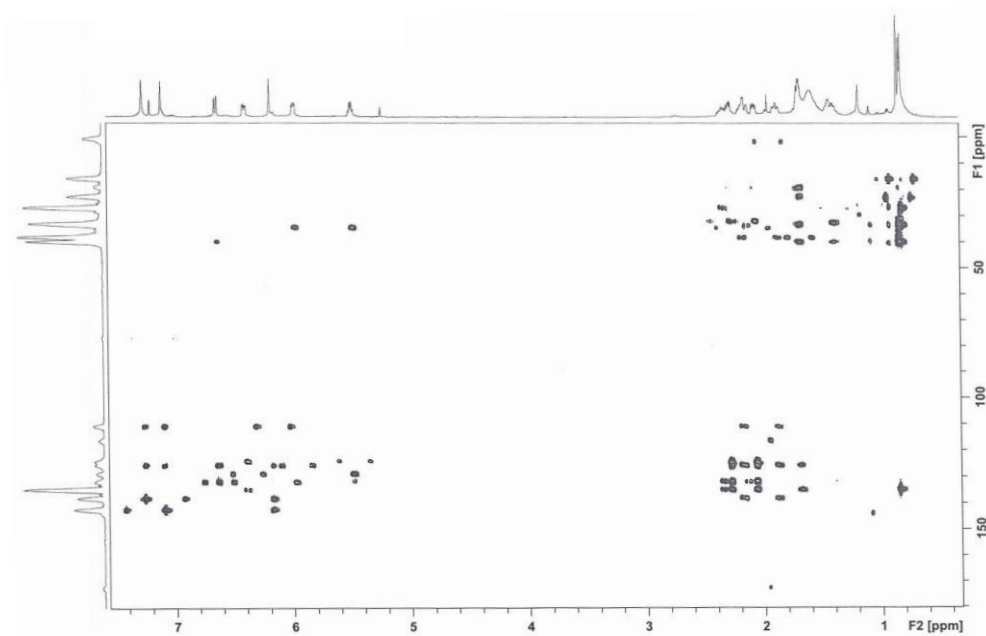

Figure S7. HMBC NMR spectrum of 1 at 600 MHz in CDCl<sub>3</sub>.

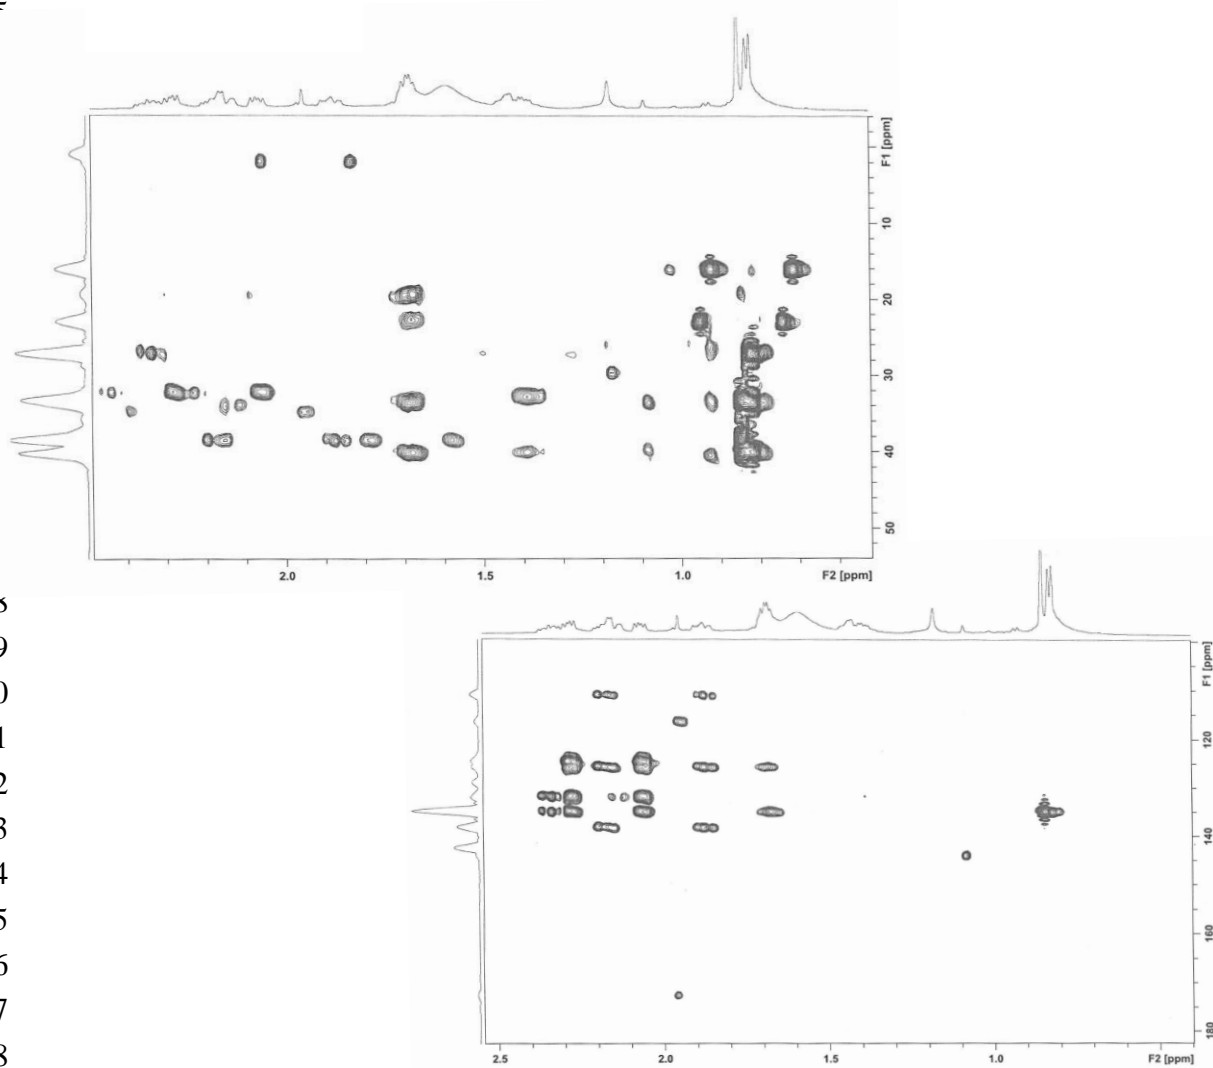

Figure S8. HMBC NMR spectrum of 1 at 600 MHz in CDCl<sub>3</sub>.

201  
202  
203  
204  
205  
206  
207  
208  
209  
210  
211  
212  
213  
214  
215  
216  
217  
218  
219  
220  
221  
222  
223  
224  
225

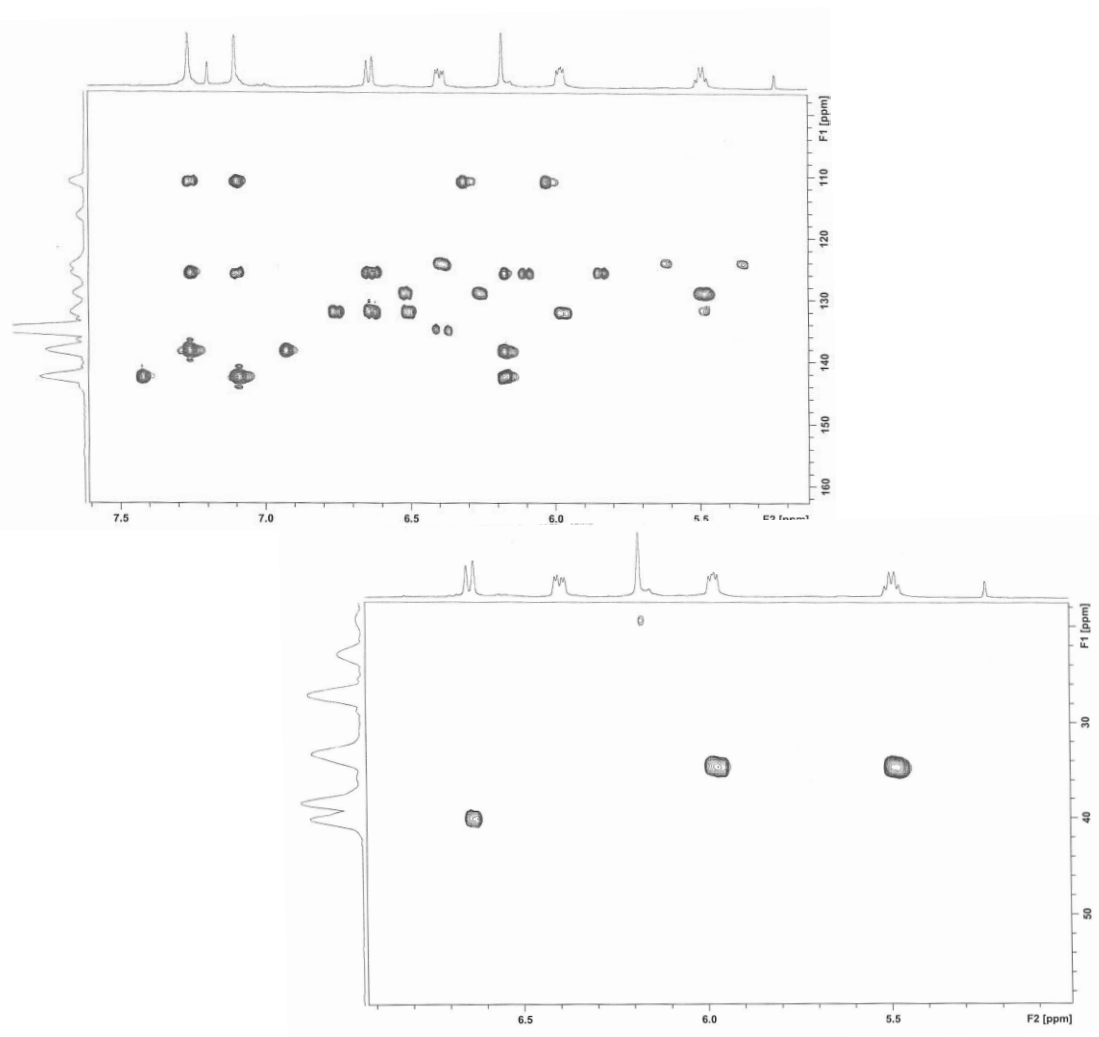

**Figure S9.** HMBC NMR spectrum of **1** at 600 MHz in CDCl<sub>3</sub>.



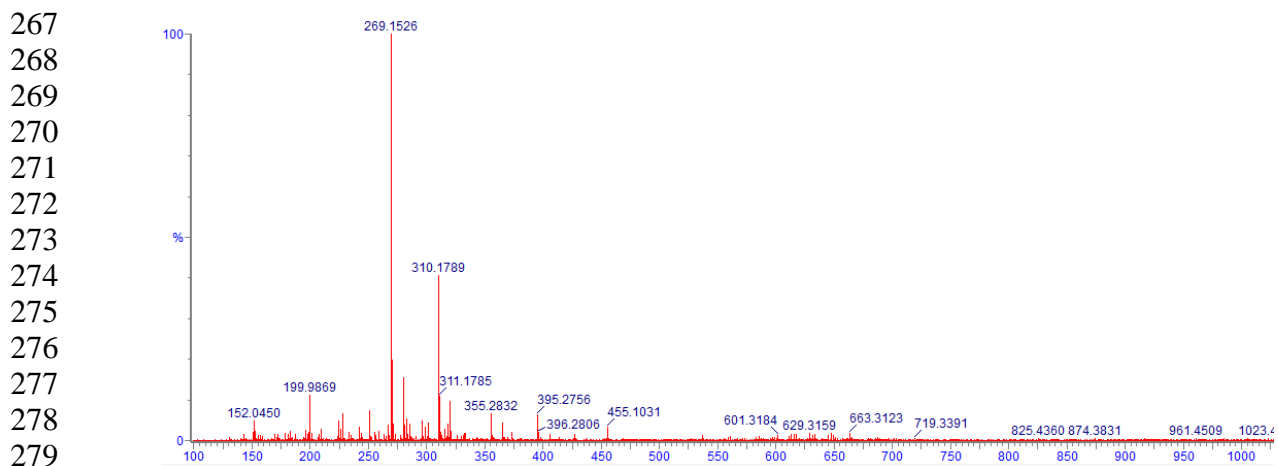

281 **Figure S12.** (+)HRESIMS spectrum of **1**

282  
283  
284  
285  
286  
287  
288  
289  
290  
291  
292  
293  
294  
295  
296  
297  
298  
299  
300  
301  
302  
303  
304  
305  
306  
307  
308  
309

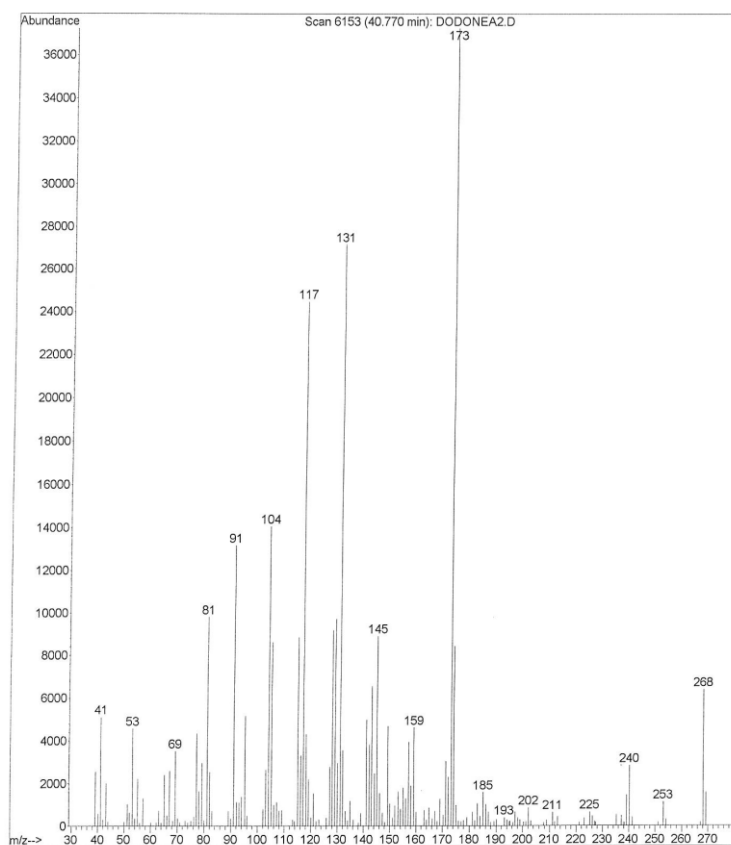

**Figure S13.** EI-MS spectrum of **1**.



310  
311  
312  
313  
314  
315  
316  
317  
318  
319  
320  
321  
322  
323  
324  
325  
326  
327  
328  
329  
330  
331  
332  
333  
334  
335  
336  
337  
338  
339  
340  
341  
342  
343  
344  
345  
346  
347  
348  
349  
350  
351  
352  
353  
354  
355  
356  
357  
358  
359  
360  
361  
362  
363  
364

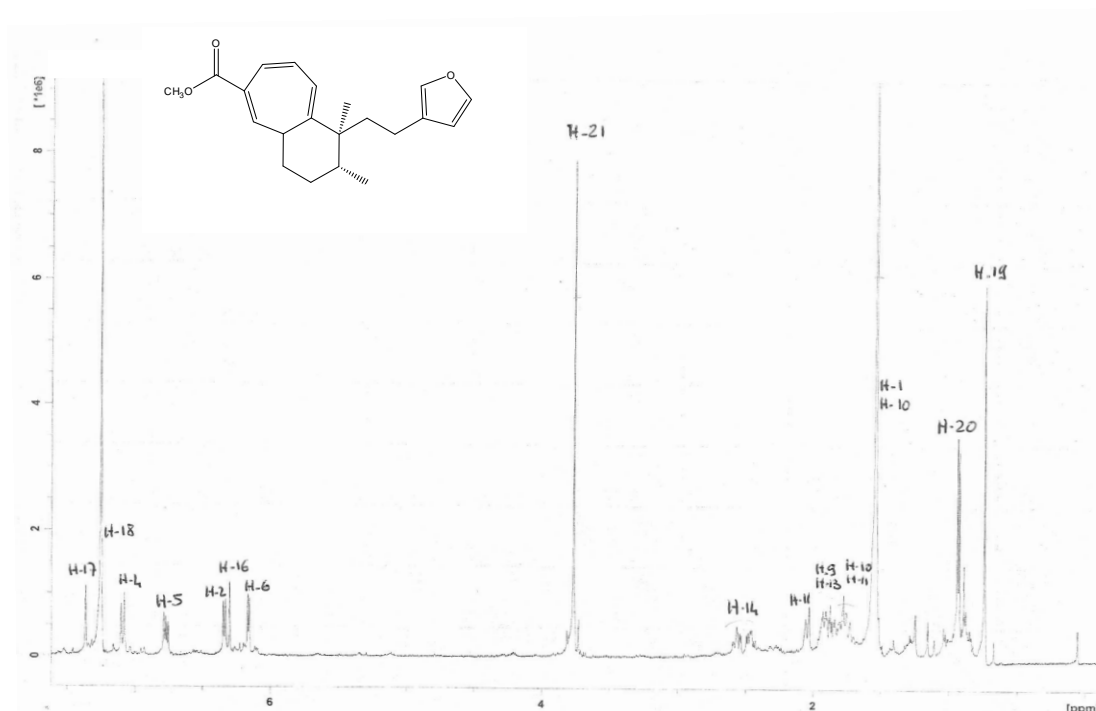

Figure S14. <sup>1</sup>H NMR spectrum of 3 at 600 MHz in CDCl<sub>3</sub>.

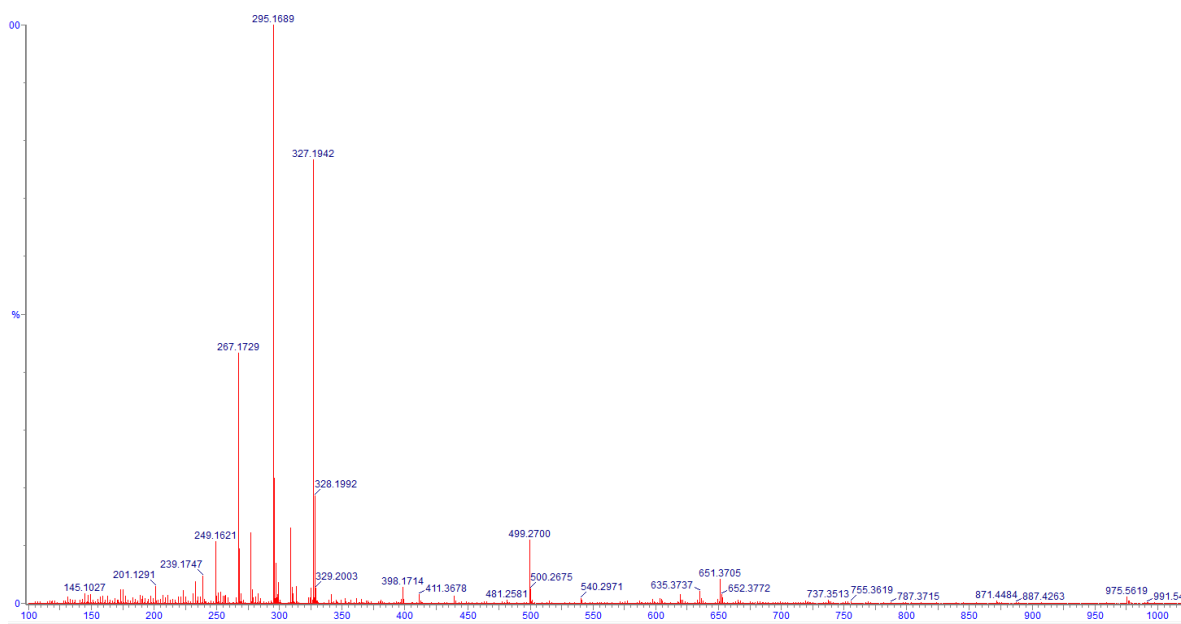

Figure S15. (+)-HRESIMS spectrum of 3

365  
366  
367  
368  
369  
370  
371  
372  
373  
374  
375  
376  
377  
378  
379  
380  
381  
382  
383  
384  
385  
386  
387  
388  
389  
390

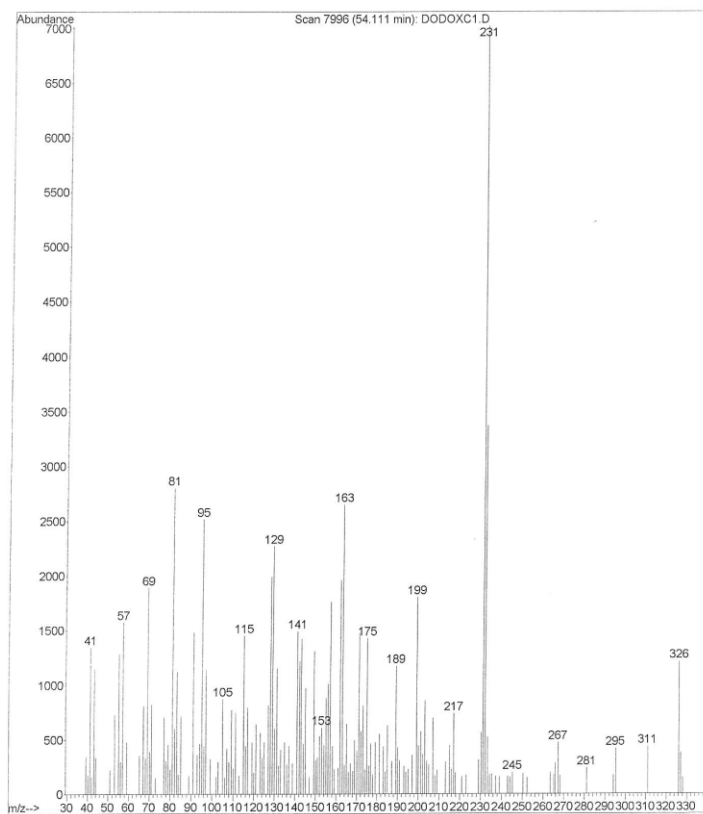

Figure S16. EI-MS spectrum of 3.
